# Supplementary material for: Rational design of flower-like cobalt–manganese-sulfide nanosheets for high performance supercapacitor electrode materials
Source: Royal Society of Chemistry journal article supplement (doi:10.1039/d0nj01727b), 2020-01-01
Supplement: d0nj01727b1.pdf [file d0nj01727b1.pdf]

## Supplementary Materials

### **Rational design of flower-like cobalt-manganese-sulfide nanosheets for high performance supercapacitor electrode materials**

Xiaomin Hu, Shunchang Liu, Yukai Chen, Jibo Jiang\*, Haishan Cong, Jiabin Tang,

Yaixin Sun, Sheng Han\*, Hualin Lin

School of Chemical and Environmental Engineering, Shanghai Institute of Technology,

Haiquan Road 100, 201418, Shanghai, P. R. China.

E-mail addresses: jibojiang0506@163.com (J. Jiang), hansheng654321@sina.com (S.

Han)

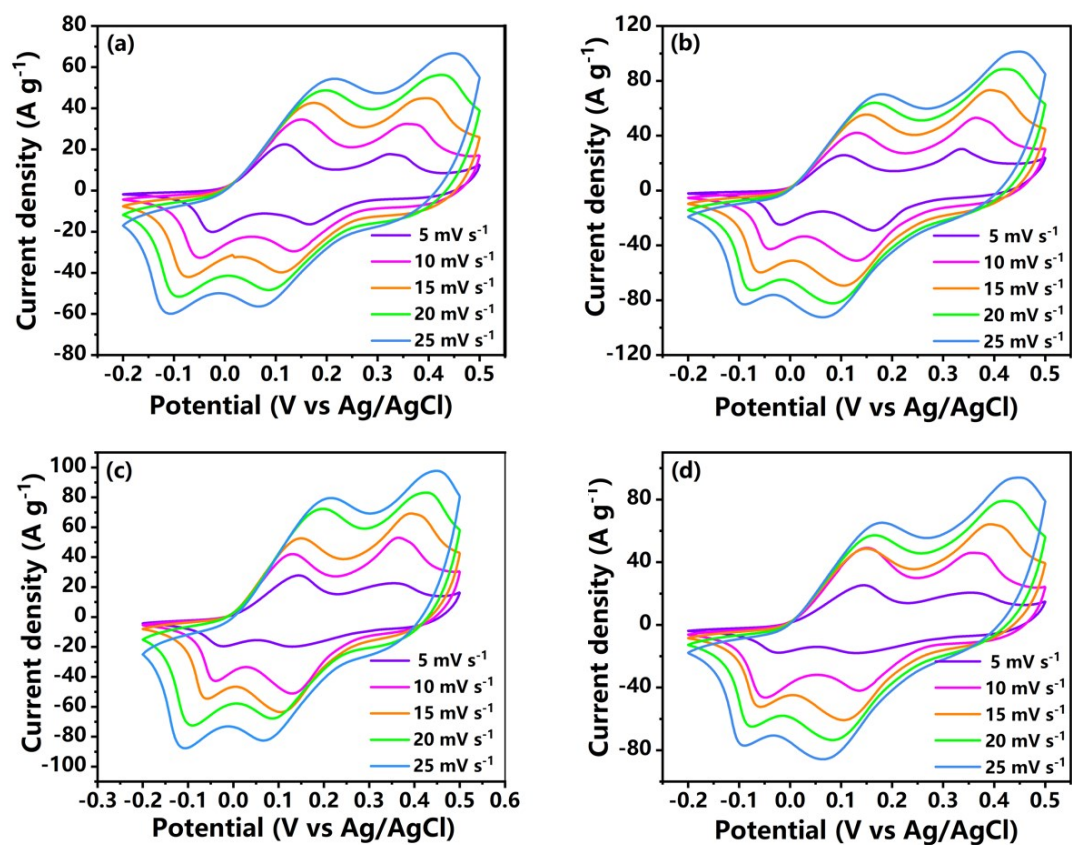

**Fig. S1.** (a) CV curves of CoMnS-2 electrode at different scanning rates, (b) CV curves of CoMnS-3 electrode at different scanning rates, (c) CV curves of CoMnS-5 electrode at different scanning rates, (d) CV curves of CoMnS-6 electrode at different scanning rates.

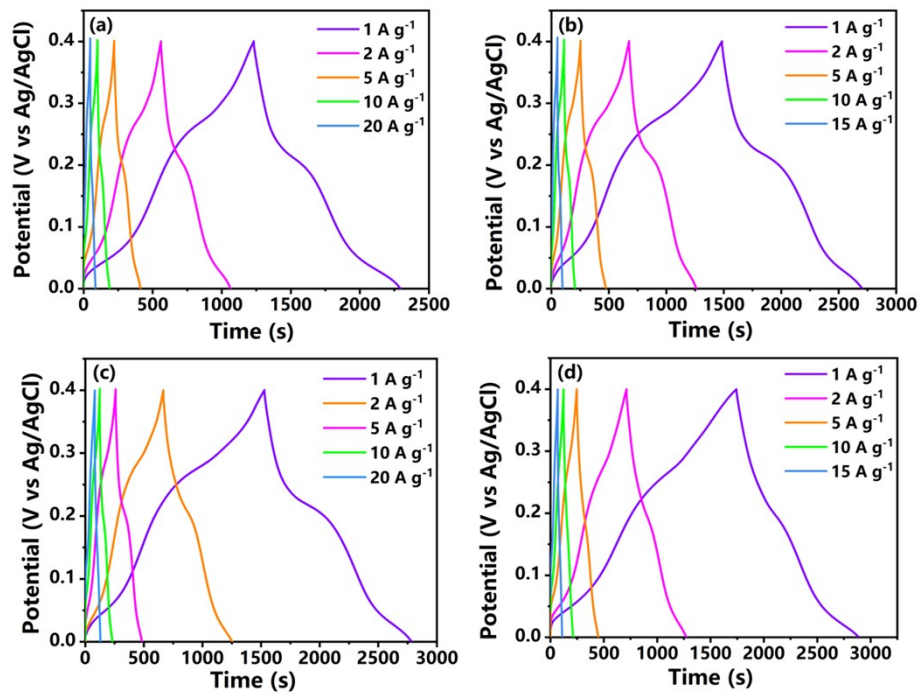

**Fig. S2.** (a) GCD curves of the CoMnS-2 electrode at different current densities, (b) GCD curves of the CoMnS-4 electrode at different current densities, (c) GCD curves of the CoMnS-5 electrode at different current densities, (d) GCD curves of the CoMnS-6 electrode at different current densities.

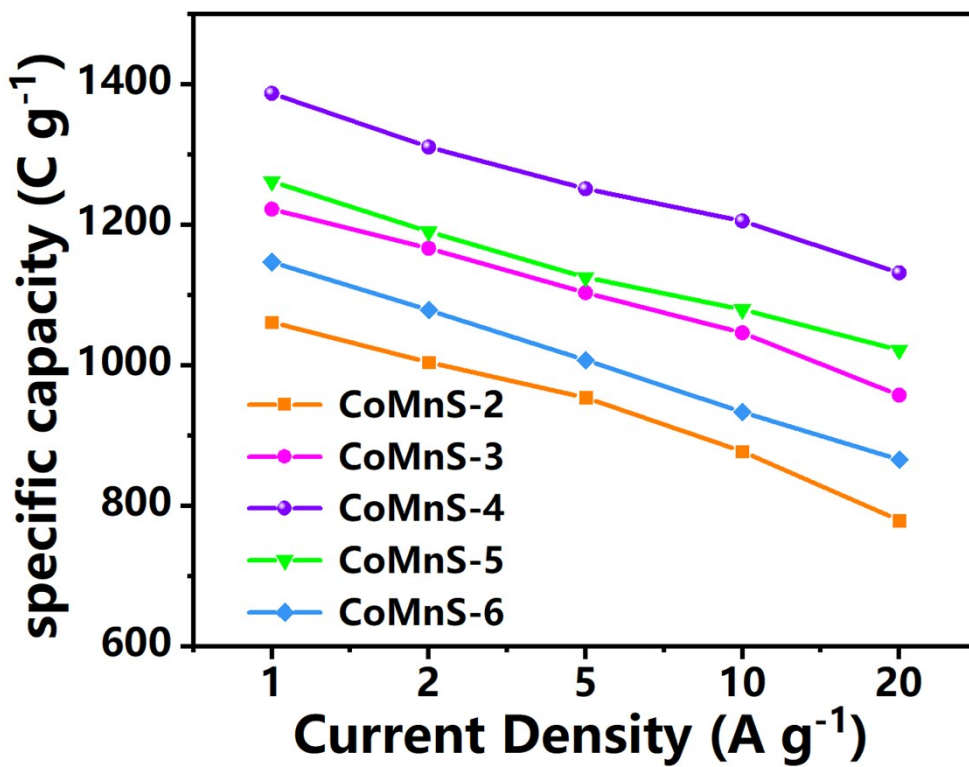

Fig. S3. Specific capacity of CoMnS-2, CoMnS-3, CoMnS-4, CoMnS-5, CoMnS-6 electrodes at various current densities.

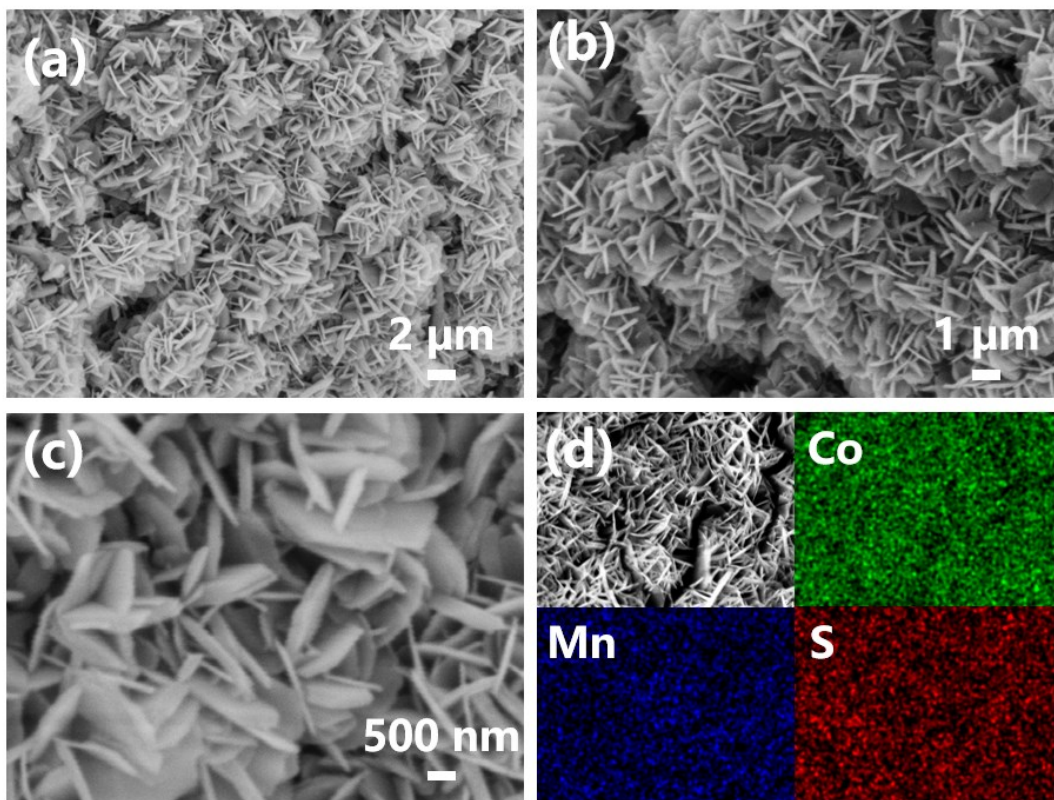

**Fig. S4.** (a–c) Low- and high-magnification SEM images of the CoMnS-4 nanomaterials after cycling test, (d) EDS elemental content of the corresponding SEM image.

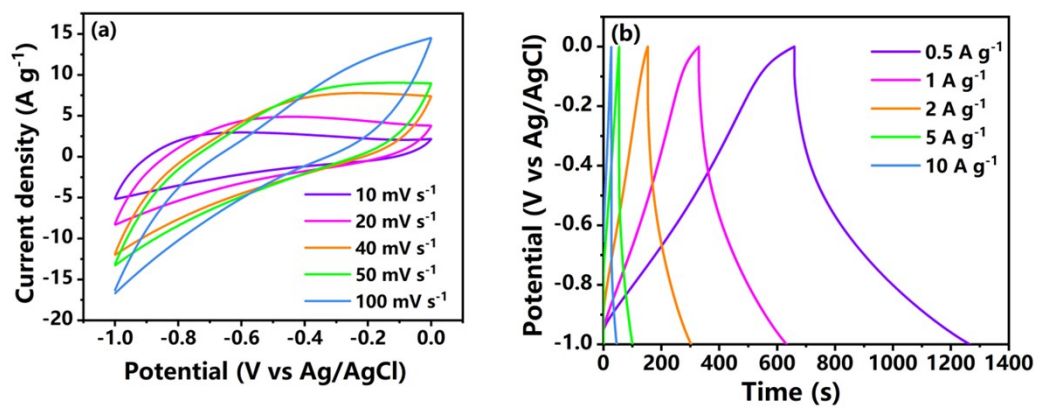

**Fig. S5.** (a) CV curves of AC electrode at different scanning rates, (b) GCD curves of the AC electrode at different current densities.

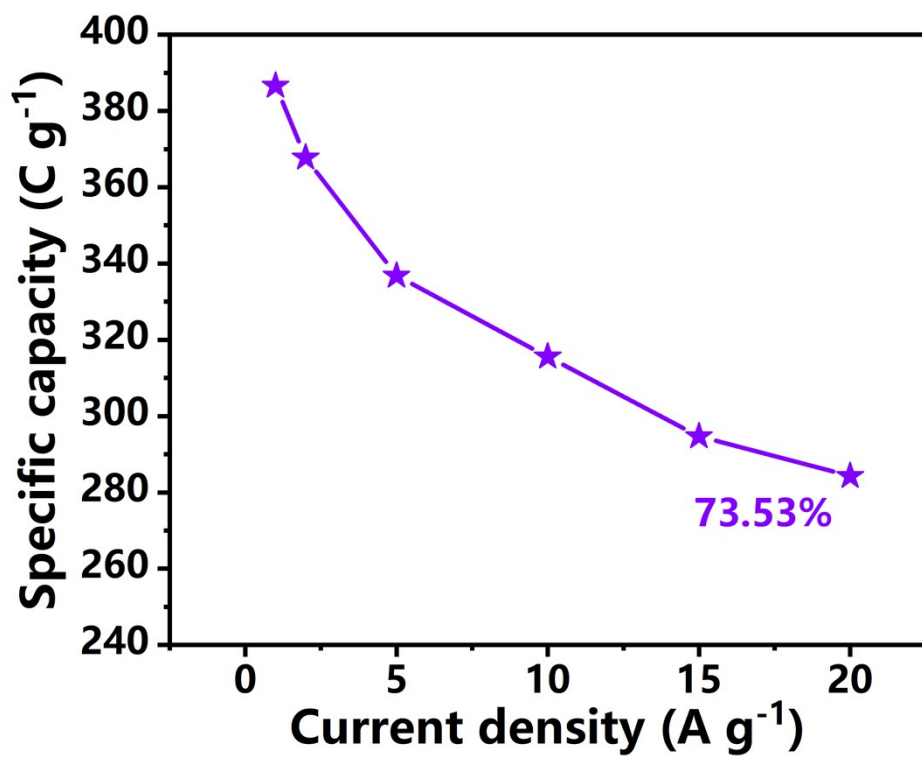

Fig. S6. Specific capacity of the CoMnS-4//AC ASC device at various current densities
